# Supplementary material
Source: PubMed Central journal article supplement (PMC3162410)
Supplement: supp_M111.264721_jbc.M111.264721-1.pdf [file supp_M111.264721_jbc.M111.264721-1.pdf]

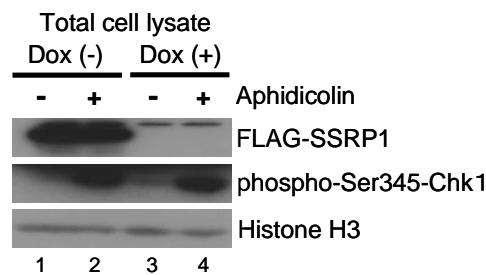

**Fig. S1. Phosphorylation status of Check1 (Chk1) in SSRP1 depleted cells.**

*SSRP1*<sup>-/-</sup> cells cultured in the presence (+) or absence (-) of Dox for 48 hrs were treated with or without aphidicolin for 1 hr. Whole-cell lysates were prepared from cells cultured in the indicated conditions. FLAG-SSRP1, phosphorylated Chk1 at Ser345, histone H3 (loading control) were detected by Western blotting. Aphidicolin, which is known to induce checkpoint activation (Hekmat-Nejad et al., 2000) was used as a positive control in the experiment. Indeed, aphidicolin induced phosphorylation of Chk1 even in the presence or absence of SSRP1 (Lanes 2, 4). The phosphorylation status of Chk1 in SSRP1-depleted cells without aphidicolin (lane 3) is almost the same level of non-depleted cells (lane 1). These results suggest that SSRP1-depletion itself does not activate checkpoint.

(Reference)

**Hekmat-Nejad, M., You, Z., Yee, M. C., Newport, J. W. and Cimprich, K. A.** (2000) *Xenopus* ATR is a replication-dependent chromatin-binding protein required for the DNA replication checkpoint. *Curr. Biol.* **10**, 1565-1573.
