# Supplementary material
Source: PubMed Central journal article supplement (PMC3162410)
Supplement: supp_M111.264721_jbc.M111.264721-3.pdf [file supp_M111.264721_jbc.M111.264721-3.pdf]

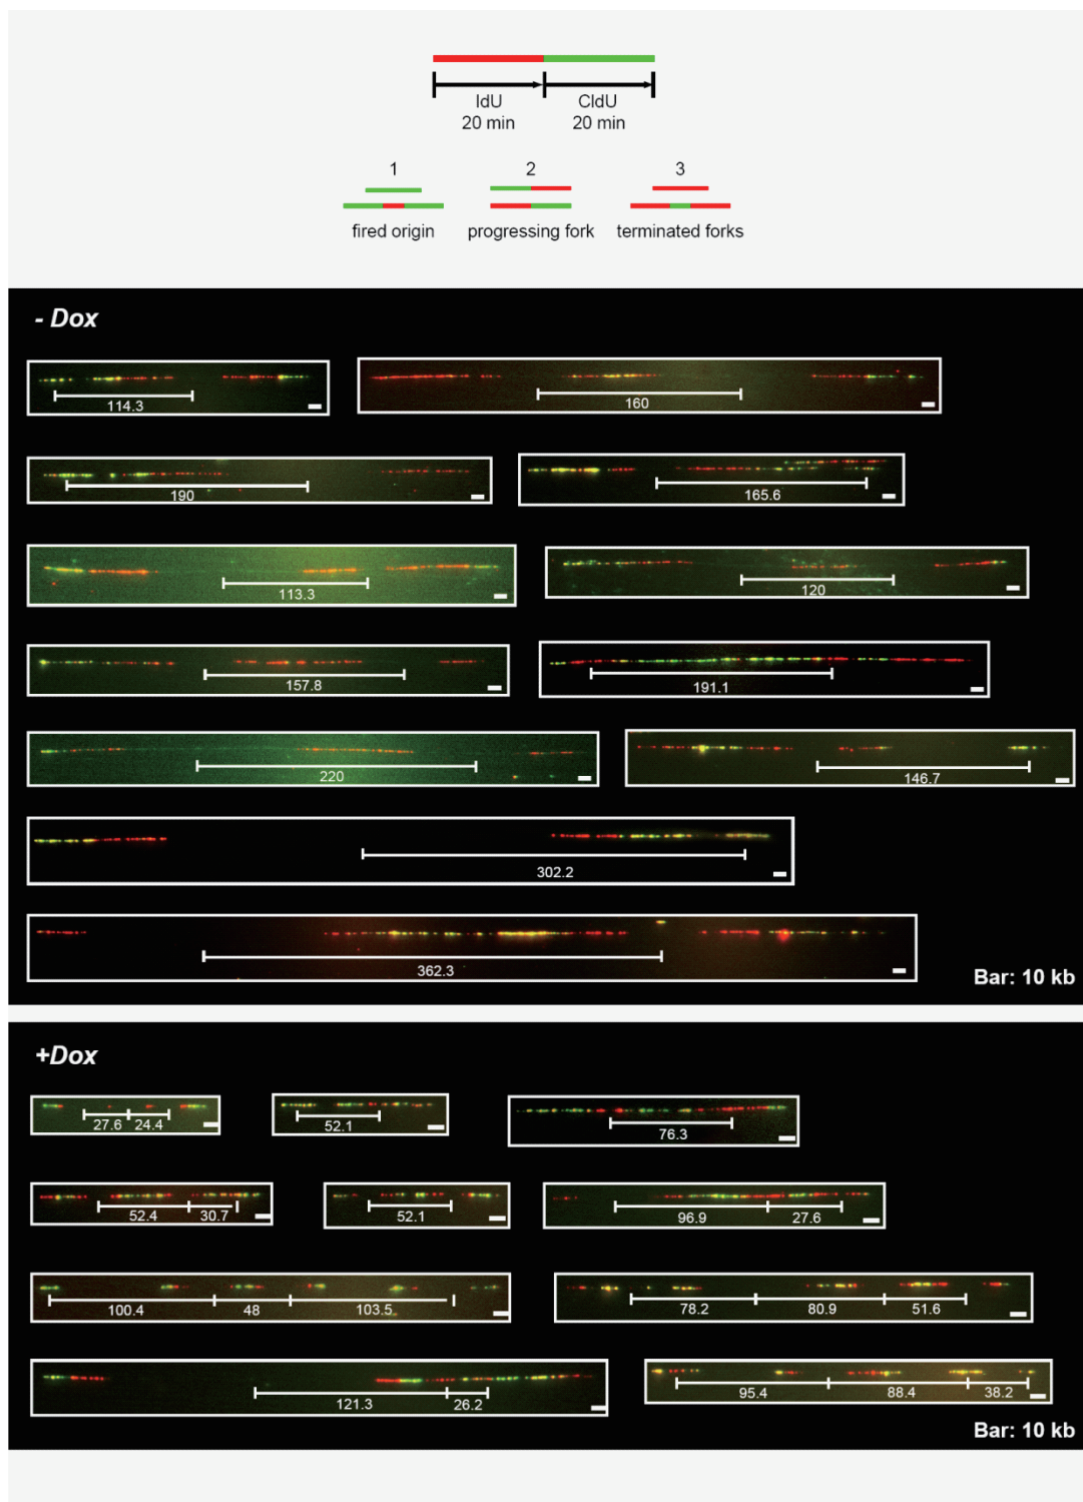

**Fig. S3. DNA fiber images for determining origin-to-origin distances for Fig. 5.**

*SSRPI*<sup>-/-</sup> cells cultured in the presence (+) or absence (-) of Dox for 48 hrs were successively pulse-labeled with IdU (red) and CldU (green), and DNA fibers were visualized by dynamic molecular combing as described. The distances between adjacent origins in replicon clusters were determined as described in “Materials and Methods”. Scale bars: 10 kb.
