# Supplementary material
Source: PubMed Central journal article supplement (PMC3162410)

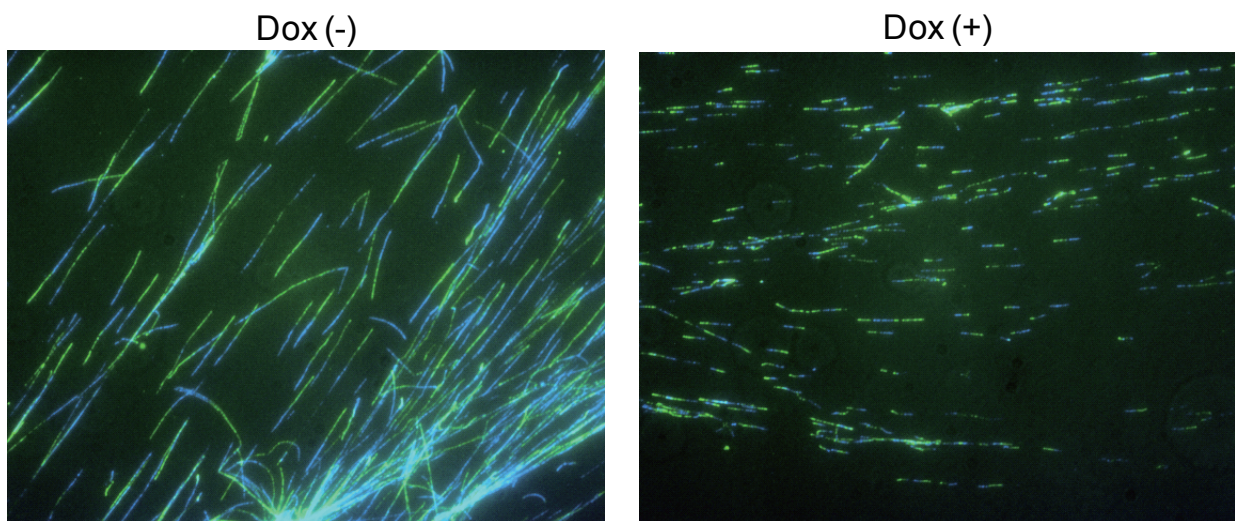

**Fig. S2. Typical overall images of DNA fibers for Fig. 4A.**

Supplement: supp_M111.264721_jbc.M111.264721-2.pdf [file supp_M111.264721_jbc.M111.264721-2.pdf]
